# Supplementary material
Source: publisher figshare collection journal article supplement (https://rs.figshare.com/ndownloader/files/13358351)
Supplement: Supplementary file 1 [file 13358351]

SUPPLEMENTAL MATERIAL:

Table S1. Mean detection probability and 95% credible intervals (CIs) for participant effort categories.

| Effort (# of hours) | Mean | 2.5% CI | 97.5% CI |
| --- | --- | --- | --- |
| < 1 | 0.16 | 0.14 | 0.19 |
| 1 – 4 | 0.29 | 0.27 | 0.30 |
| 4 – 8 | 0.40 | 0.38 | 0.42 |
| > 8 | 0.48 | 0.44 | 0.51 |
| Missing values | 0.33 | 0.25 | 0.42 |


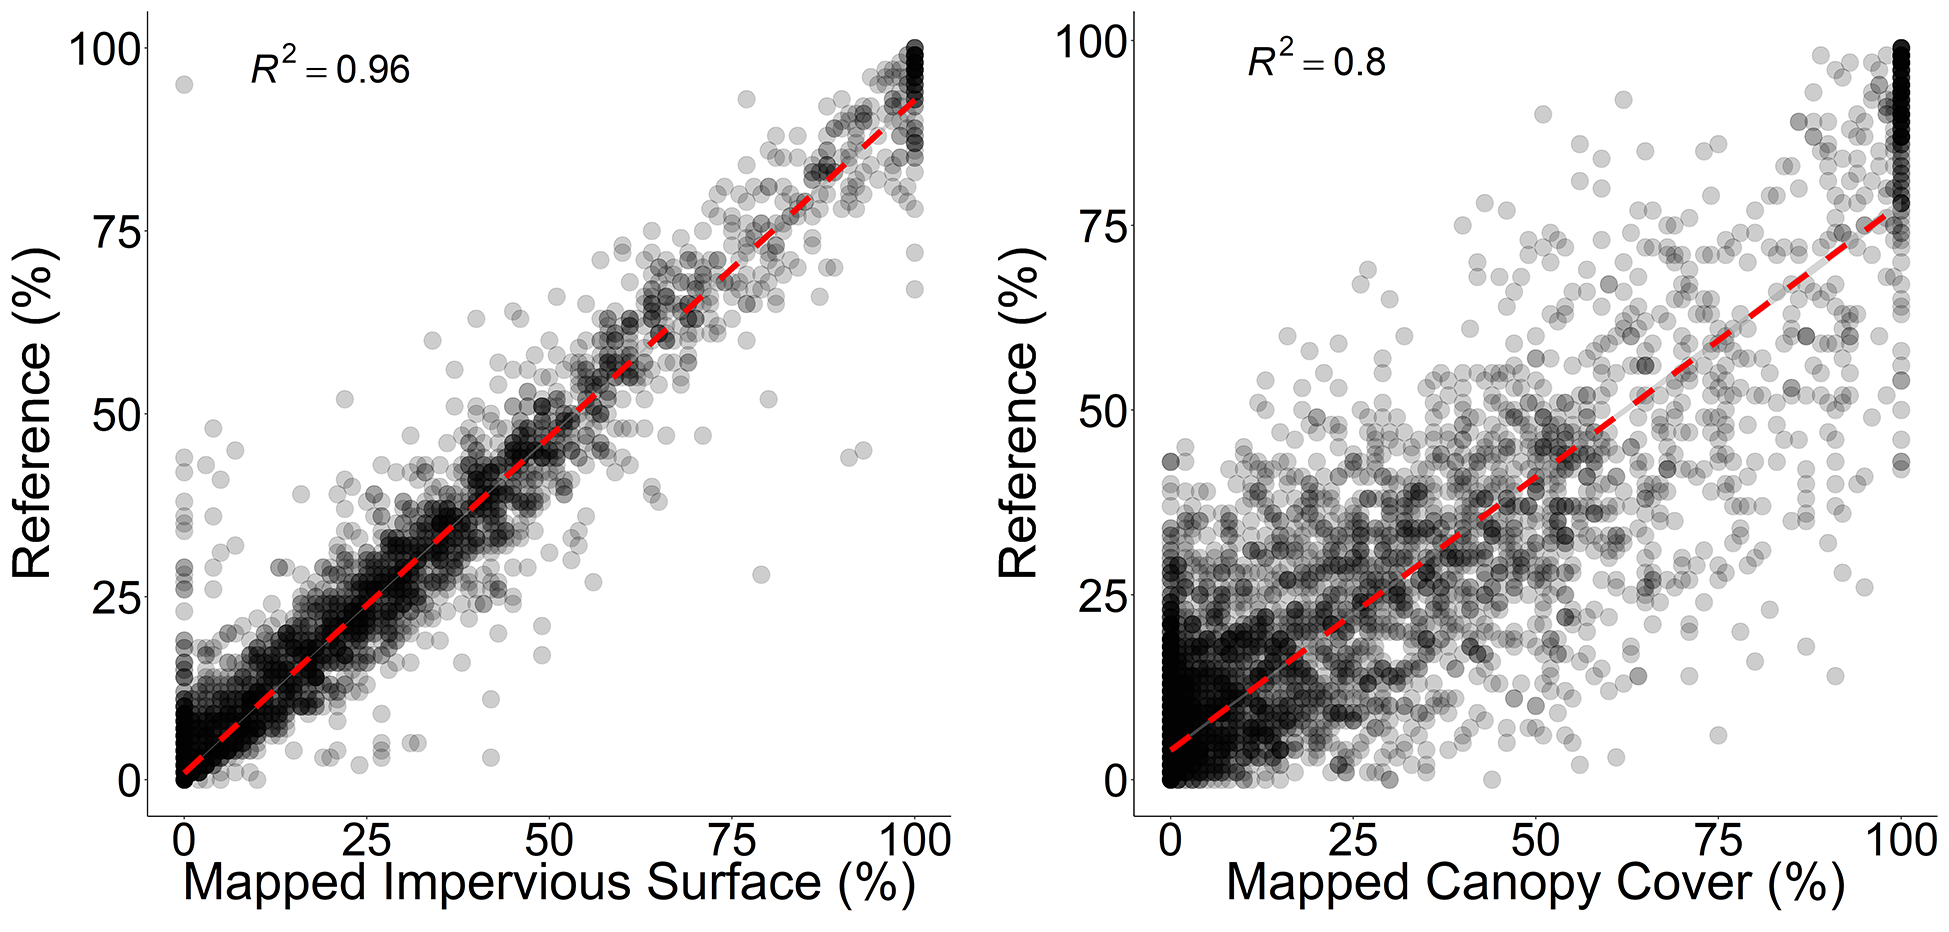


Figure S1. We assessed the accuracy of our imperviousness and tree canopy cover maps using the 1-m CMAP dataset from 2010. We randomly selected 7000 Landsat pixel samples and estimated the reference imperviousness and tree cover proportion for each Landsat pixel sample. We found that both imperviousness and tree canopy cover layers were highly correlated with the 2010 reference data (*R2* = 0.96 and 0.80, respectively).


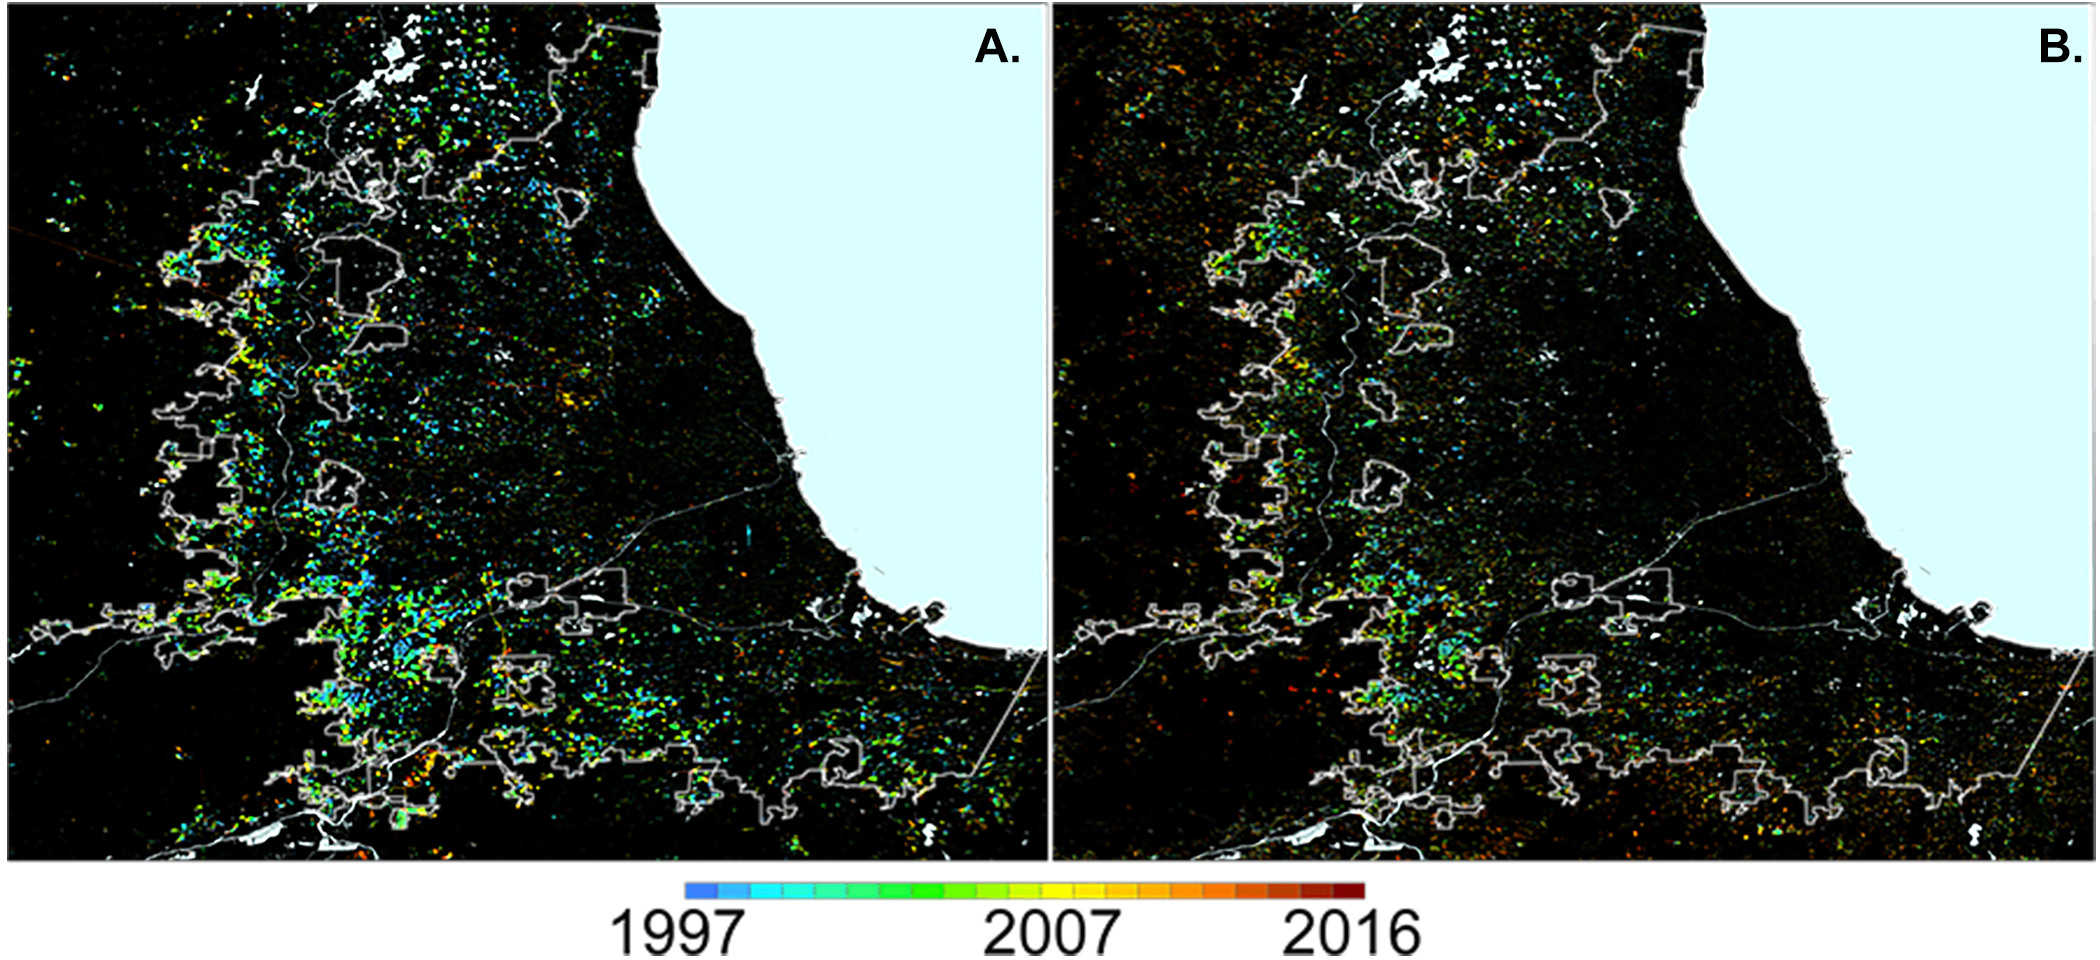


Figure S2. Year of the greatest increase in A) imperviousness and B) tree canopy cover in Chicago, IL. Imperviousness in Chicago increased during the early 2000s (green). Tree canopy cover also increased in similar areas, but with less magnitude.
